# Supplementary material for: Comparison of Fasciocutaneous and Muscle-based Free Flaps for Soft Tissue Reconstruction of the Upper Extremity
Source: PubMed Central journal article supplement — Plast Reconstr Surg Glob Open. 2019 Dec 31;7(12):e2543. doi: 10.1097/GOX.0000000000002543 (PMC7288888; doi:10.1097/gox.0000000000002543), 2019-12-31

**Supplementary Digital Content 1**

A 80-year-old male patient suffered from wrist empyema (A) with a consecutive dorsal soft tissue defect of the hand with exposed extensor tendons (B). Defect coverage of the exposed tendons and hand was achieved by using an anterolateral thigh flap, ALT (C and D).

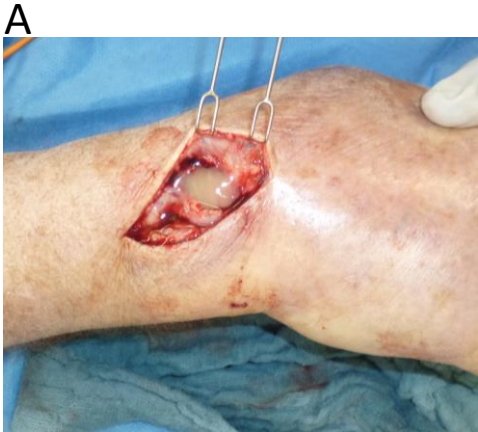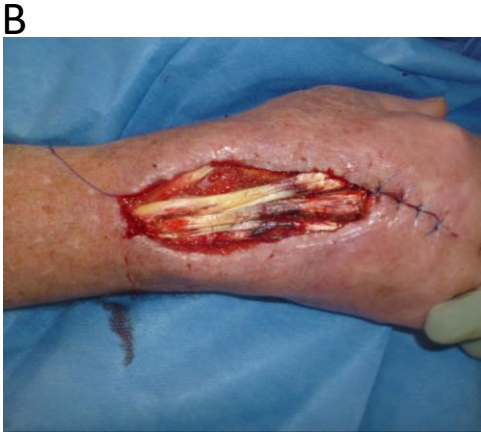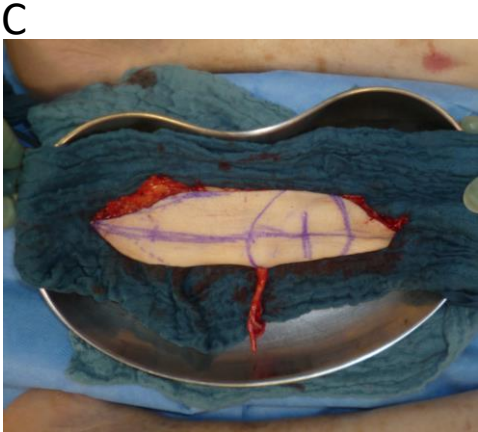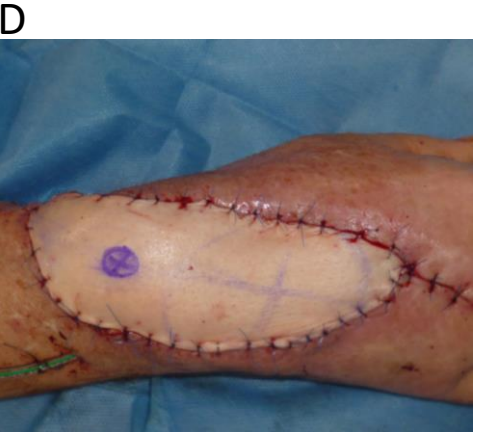

Supplement: gox-7-e2543-s001.pdf [file gox-7-e2543-s001.pdf]
