# Supplementary material for: Comparison of Fasciocutaneous and Muscle-based Free Flaps for Soft Tissue Reconstruction of the Upper Extremity
Source: PubMed Central journal article supplement — Plast Reconstr Surg Glob Open. 2019 Dec 31;7(12):e2543. doi: 10.1097/GOX.0000000000002543 (PMC7288888; doi:10.1097/gox.0000000000002543), 2019-12-31

Supplemental Digital Content 2

A 61-year-old male patient suffered from a machine crush injury of his forearm, resulting in a subtotal amputation with a comprehensive soft tissue defect as well as ulna bone and radius fractures and segmental injuries of the vessels and tendons. After primary stabilizing operations with osteosyntheses of the fractures and reconstruction of the vessels and tendons (A-C), defect coverage was performed by using a latissimus dorsi flap in combination with split-thickness skin grafts (D). Appearance of the reconstructed forearm at 3 months' follow-up (E and F).

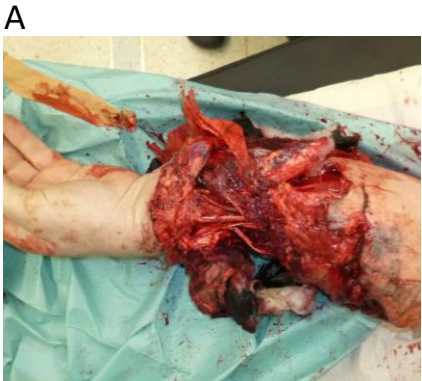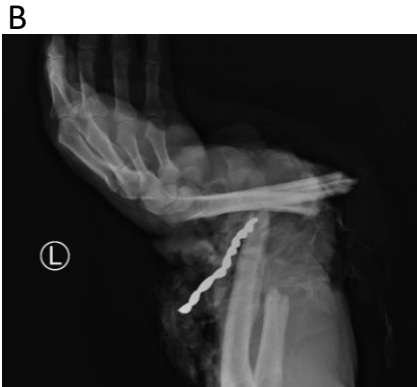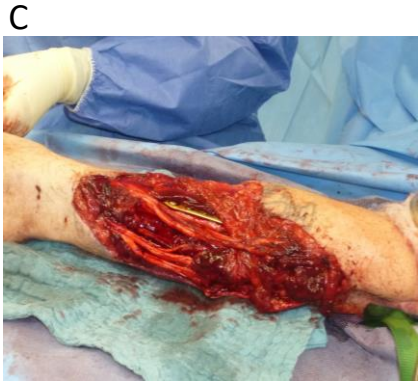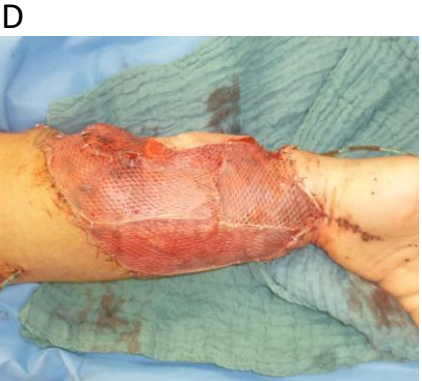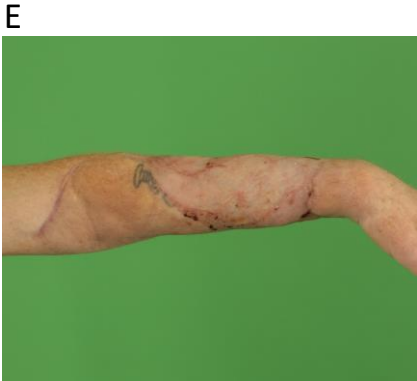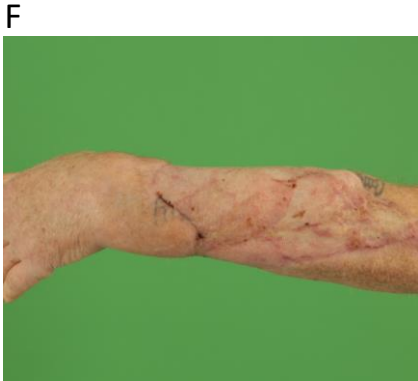

Supplement: gox-7-e2543-s002.pdf [file gox-7-e2543-s002.pdf]
